# Supplementary material for: In Vitro Metabolite Profiling of ADB-FUBINACA, A New Synthetic Cannabinoid
Source: PubMed Central journal article supplement — Curr Neuropharmacol. 2017 Jul;15(5):682–91. doi: 10.2174/1570159X15666161108123419 (PMC5771045; doi:10.2174/1570159x15666161108123419), 2017-07
Supplement: CN-15-682_SD1.pdf [file CN-15-682_SD1.pdf]

# SUPPLEMENTARY MATERIAL

## In Vitro Metabolite Profiling of ADB-FUBINACA, A New Synthetic Cannabinoid

Jeremy Carlier<sup>a</sup>, Xingxing Diao<sup>a</sup>, Ariane Wohlfarth<sup>a,b</sup>, Karl Scheidweiler<sup>a</sup>, and Marilyn A. Huestis<sup>a,c,\*</sup>

<sup>a</sup>Chemistry and Drug Metabolism, Intramural Research Program, National Institute on Drug Abuse, National Institutes of Health, Baltimore, USA; <sup>b</sup>National Board of Forensic Medicine, Linköping, Sweden. Division of Drug Research, Department of Medical and Health Sciences, Linköping University, Linköping, Sweden; <sup>c</sup>School of Medicine, University of Maryland, Baltimore, USA

**Table S1.** Inclusion list of predicted biotransformations for information-dependent acquisition MS/MS mode with Analyst software. MS/MS, tandem mass spectrometry.

parent, oxidation (+O), carboxylation (+2O-2H), desaturation (-2H), hydrogenation (+2H), ketone formation (-2H+O), defluorination (-F+H), defluorobenzoylation (-C<sub>7</sub>H<sub>6</sub>F), amide hydrolysis to carboxylic acid (-NH<sub>2</sub>+OH), internal hydrolysis (+2H+O), glucuronidation (+C<sub>6</sub>H<sub>8</sub>O<sub>6</sub>), sulfation (+SO<sub>3</sub>), di-oxidation (+2O), oxidation + defluorination (-F+OH), oxidation + amide hydrolysis (-NH<sub>2</sub>+OH+O), oxidation + internal hydrolysis (+2H+2O), oxidation + glucuronidation (+C<sub>6</sub>H<sub>8</sub>O<sub>7</sub>), oxidation + sulfation (+SO<sub>4</sub>), carboxylation + defluorination (-F-H+2O), di-hydrogenation (+4H), ketone formation + defluorination (-F-H+O), tri-oxidation (+3O), di-oxidation + ketone formation (-2H+3O), di-oxidation + defluorination (-F+H+2O), di-oxidation + internal hydrolysis (+2H+3O), di-oxidation + glucuronidation (+C<sub>6</sub>H<sub>8</sub>O<sub>8</sub>), oxidation + defluorination + glucuronidation (-F+OH+C<sub>6</sub>H<sub>8</sub>O<sub>6</sub>), carboxylation + defluorination + glucuronidation (-F-H+2O+C<sub>6</sub>H<sub>8</sub>O<sub>6</sub>), ketone formation + defluorination + glucuronidation (-F-H+O+C<sub>6</sub>H<sub>8</sub>O<sub>6</sub>), tetra-oxidation (+4O), tri-oxidation + defluorination (-F+H+3O), di-oxidation + defluorination + glucuronidation (-F+OH+C<sub>6</sub>H<sub>8</sub>O<sub>7</sub>), tetra-oxidation + defluorination (-F+H+4O), tri-oxidation + defluorination + glucuronidation (-F+OH+C<sub>6</sub>H<sub>8</sub>O<sub>8</sub>), tetra-oxidation + defluorination + glucuronidation (-F+OH+C<sub>6</sub>H<sub>8</sub>O<sub>9</sub>).

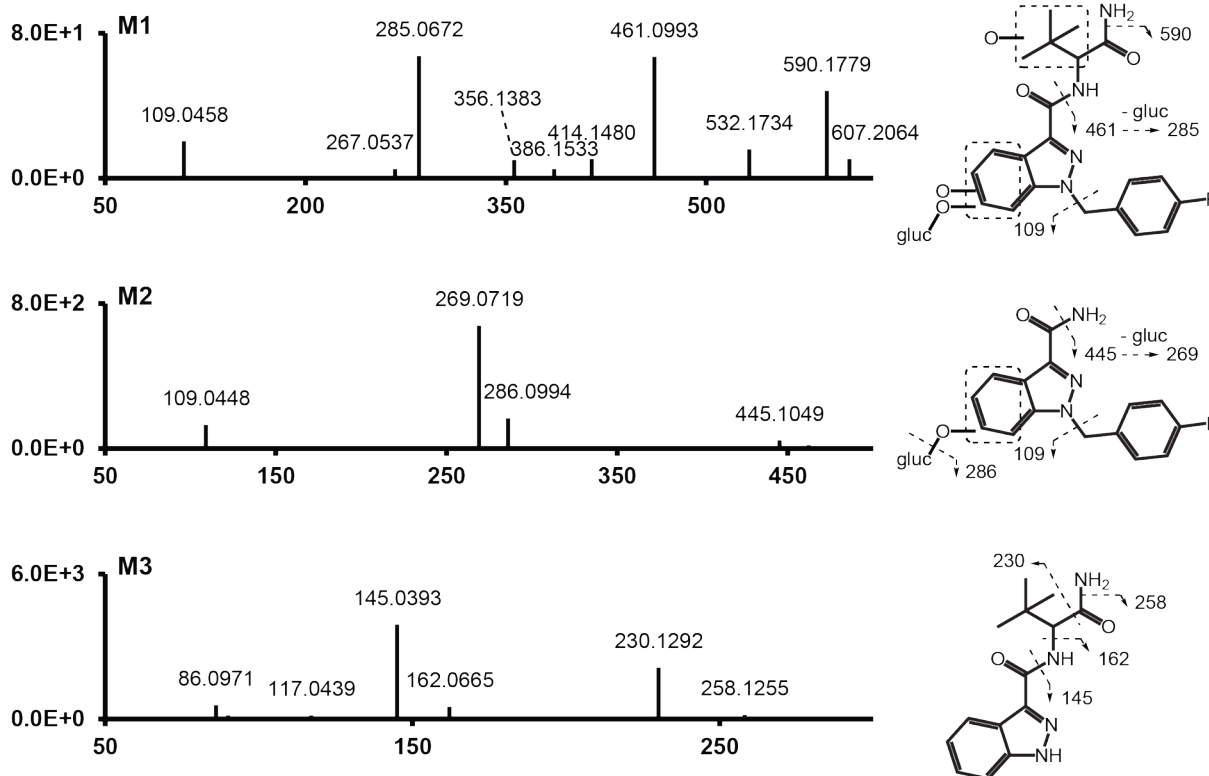

Fig. (S1). contd....

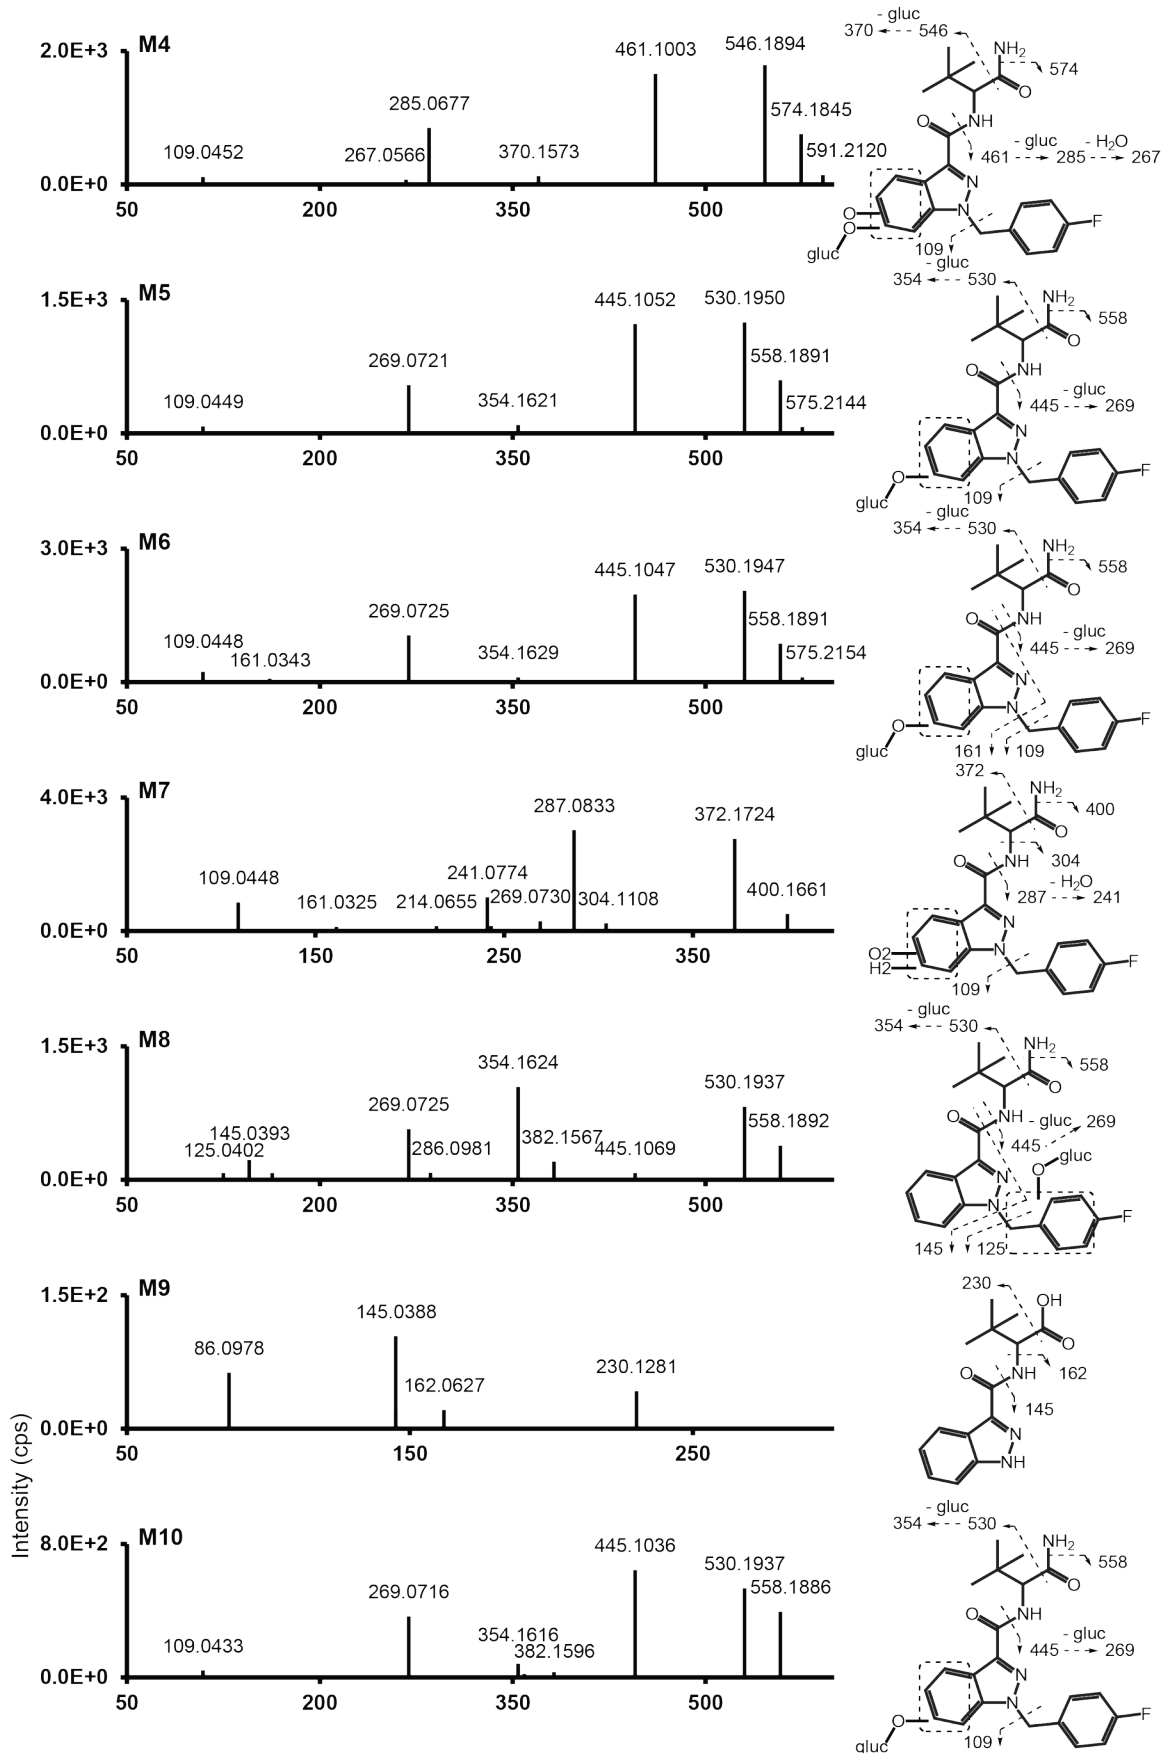

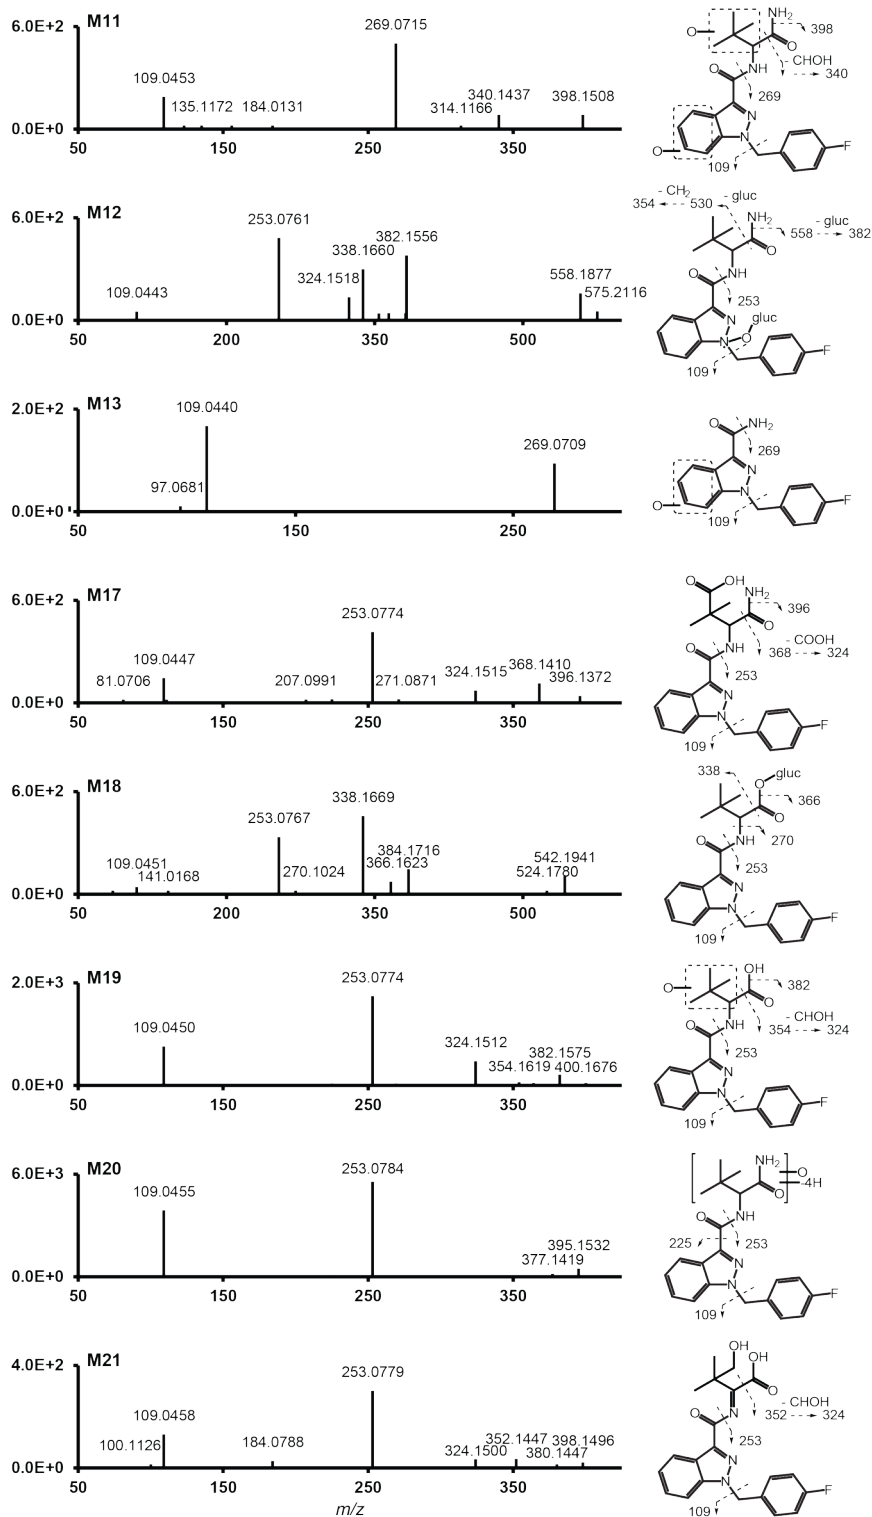

**Fig. (S1).** ADB-FUBINACA minor metabolites' MS/MS spectrum and assigned fragmentation patterns. Metabolites are presented in ascending retention time order.
